# Supplementary material for: Differential Involvement of the Agranular vs Granular Insular Cortex in the Acquisition and Performance of Choice Behavior in a Rodent Gambling Task
Source: PubMed Central journal article supplement (PMC4864659; doi:10.1038/npp.2015.133), 2015-06-10

FIGURE S2

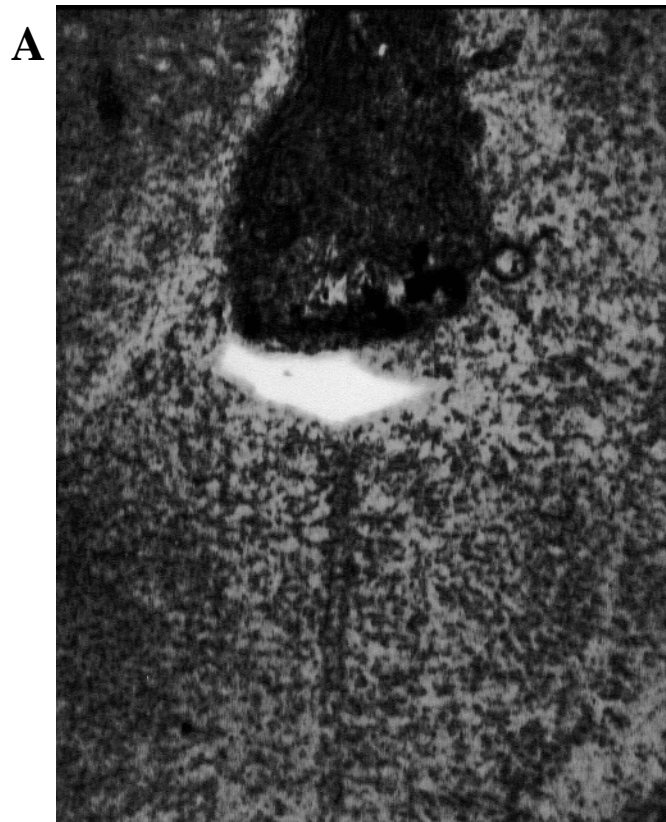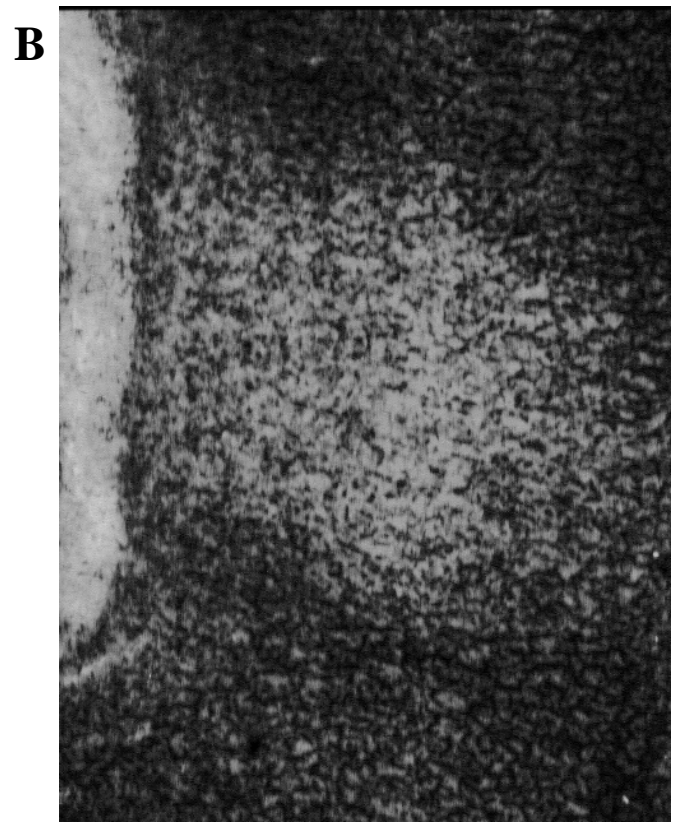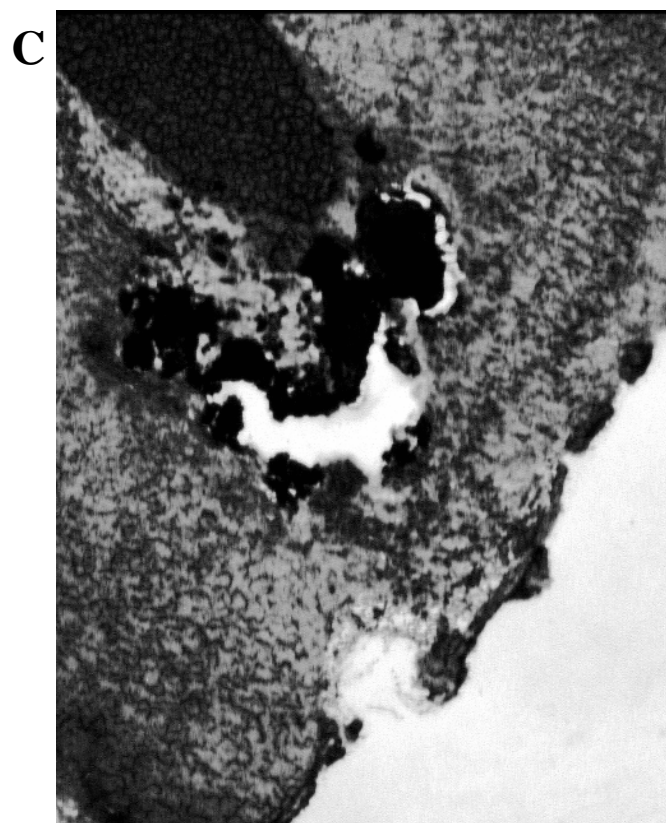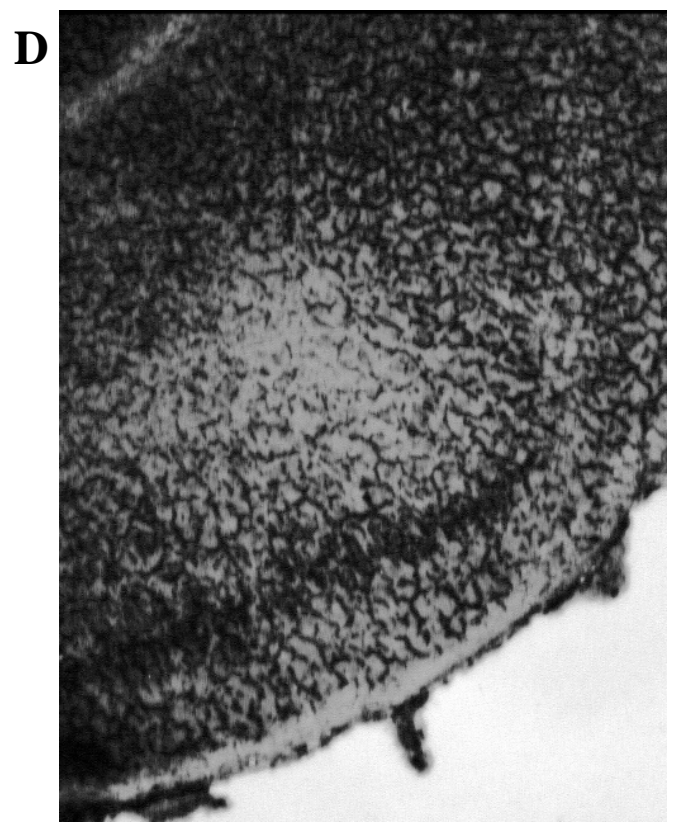

Supplement: npp2015133x2.pdf [file npp2015133x2.pdf]
